# Supplementary material for: Investigation of Trehalose Supplementation Impacting Campylobacter jejuni and Clostridium perfringens from Broiler Farming
Source: MDPI journal article supplement (doi:10.3390/vetsci10070466), 2023-07-15
Supplement: s1 [file s1]

## **Supplementary Materials**

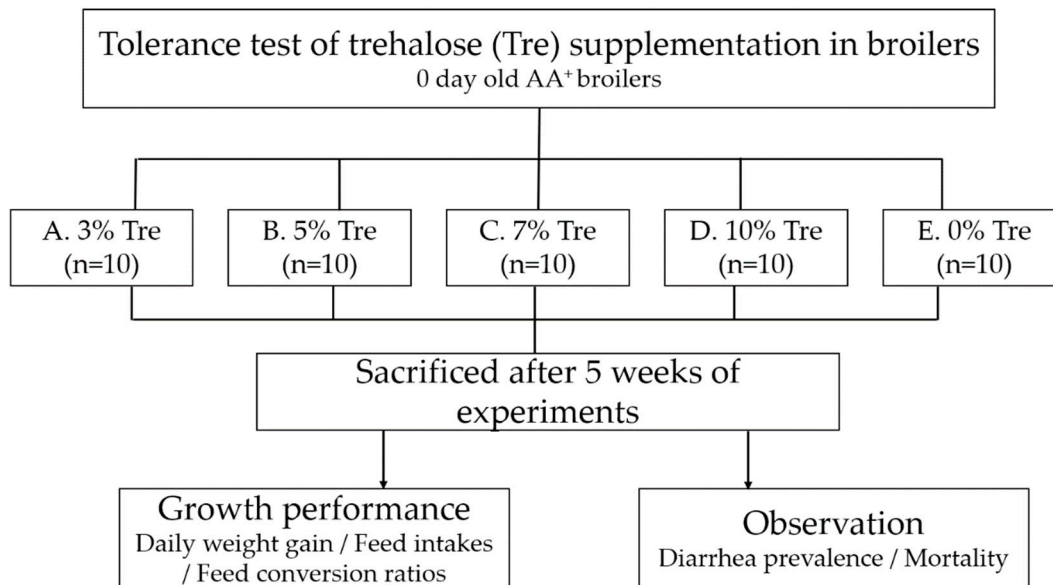

**Supplementary Figure S1.** Scheme of experiment 1: The tolerance test of trehalose on broilers

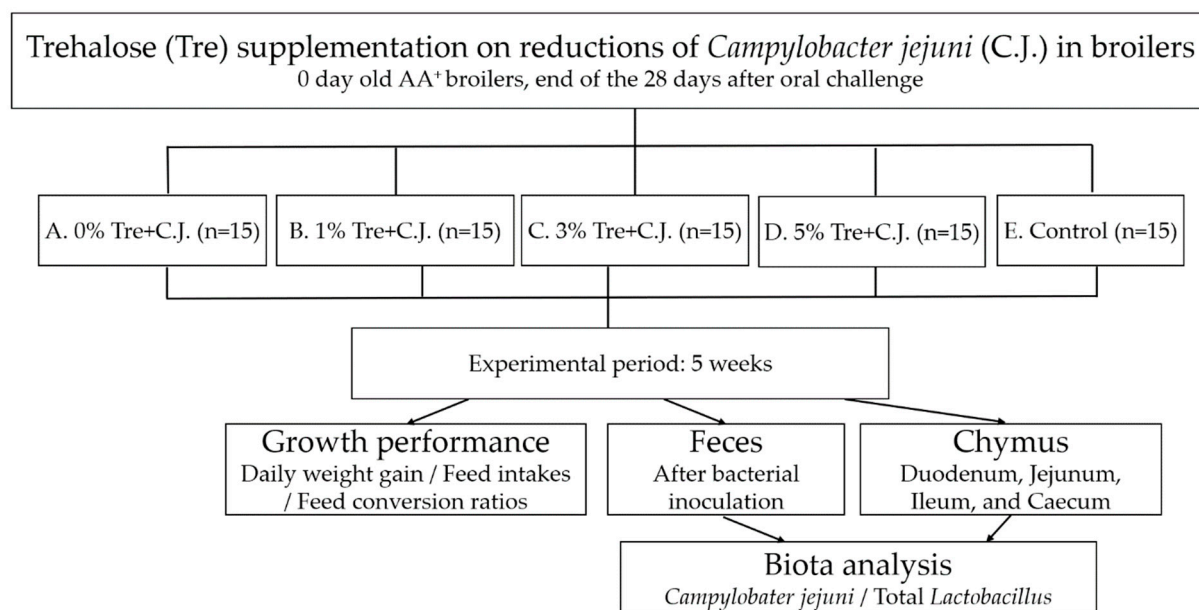

**Supplementary Figure S2.** Scheme of experiment 2-1 : The antibacterial tests of trehalose on *C. jejuni*

Trehalose (Tre) supplementation on reductions of *Clostridium perfringens* (C.P.) in broilers  
0 day old AA<sup>+</sup> broilers, end of the 32 days after oral challenge

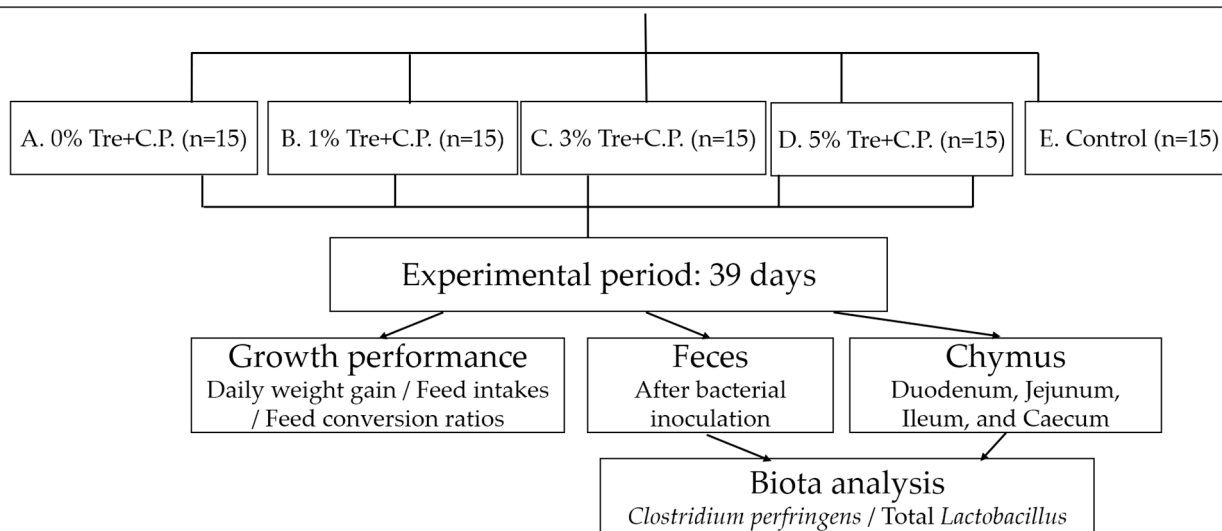

**Supplementary Figure S3.** Scheme of experiment 2-2 : The antibacterial tests of trehalose on *C. perfringens*

**Supplementary Table S1.** The components of experimental diets in the starter period of broilers.

| Ingredient                                           | Levels of trehalose (%) |        |        |        |        |
|------------------------------------------------------|-------------------------|--------|--------|--------|--------|
|                                                      | 0                       | 3      | 5      | 7      | 10     |
|                                                      | g/Kg                    |        |        |        |        |
| Yellow corn                                          | 384.7                   | 384.7  | 384.7  | 384.7  | 384.7  |
| Soybean meal                                         | 398.1                   | 398.1  | 398.1  | 398.1  | 398.1  |
| SFish meal                                           | 50.0                    | 50.0   | 50.0   | 50.0   | 50.0   |
| Soybean oil                                          | 82.0                    | 82.0   | 82.0   | 82.0   | 82.0   |
| DL-methionine                                        | 2.0                     | 2.0    | 2.0    | 2.0    | 2.0    |
| Ca(H <sub>2</sub> PO <sub>4</sub> )-H <sub>2</sub> O | 13.1                    | 13.1   | 13.1   | 13.1   | 13.1   |
| CaCO <sub>3</sub>                                    | 12.0                    | 12.0   | 12.0   | 12.0   | 12.0   |
| NaCl                                                 | 3.0                     | 3.0    | 3.0    | 3.0    | 3.0    |
| Vitamin-premix                                       | 3.0                     | 3.0    | 3.0    | 3.0    | 3.0    |
| Mineral-premix                                       | 2.0                     | 2.0    | 2.0    | 2.0    | 2.0    |
| Choline                                              | 0.1                     | 0.1    | 0.1    | 0.1    | 0.1    |
| SiO <sub>2</sub>                                     | 100.0                   | 70.0   | 50.0   | 30.0   | 0.0    |
| Trehalose                                            | 0.0                     | 30.0   | 50.0   | 70.0   | 100.0  |
| Total                                                | 1000.0                  | 1000.0 | 1000.0 | 1000.0 | 1000.0 |
|                                                      | <i>Calculate value</i>  |        |        |        |        |
| Metabolizable<br>energy (Kcal/Kg)                    | 3031                    | 3031   | 3031   | 3031   | 3031   |
| Crude protein (g/Kg)                                 | 235.0                   | 235.0  | 235.0  | 235.0  | 235.0  |
| Calcium (g/Kg)                                       | 10.9                    | 10.9   | 10.9   | 10.9   | 10.9   |
| Available<br>phosphorus (g/Kg)                       | 5.0                     | 5.0    | 5.0    | 5.0    | 5.0    |

**Supplementary Table S2.** The components of experimental diets in the grower period of broilers.

| Ingredient                                           | Levels of trehalose (%) |        |        |        |        |
|------------------------------------------------------|-------------------------|--------|--------|--------|--------|
|                                                      | 0                       | 3      | 5      | 7      | 10     |
|                                                      | g/Kg                    |        |        |        |        |
| Yellow corn                                          | 365.7                   | 365.7  | 365.7  | 365.7  | 365.7  |
| Soybean meal                                         | 440.6                   | 440.6  | 440.6  | 440.6  | 440.6  |
| Fish meal                                            | 0.0                     | 0.0    | 0.0    | 0.0    | 0.0    |
| Soybean oil                                          | 107.0                   | 107.0  | 107.0  | 107.0  | 107.0  |
| DL-methionine                                        | 2.3                     | 2.3    | 2.3    | 2.3    | 2.3    |
| Ca(H <sub>2</sub> PO <sub>4</sub> )-H <sub>2</sub> O | 16.0                    | 16.0   | 16.0   | 16.0   | 16.0   |
| CaCO <sub>3</sub>                                    | 10.3                    | 10.3   | 10.3   | 10.3   | 10.3   |
| NaCl                                                 | 3.0                     | 3.0    | 3.0    | 3.0    | 3.0    |
| Vitamin-premix                                       | 3.0                     | 3.0    | 3.0    | 3.0    | 3.0    |
| Mineral-premix                                       | 2.0                     | 2.0    | 2.0    | 2.0    | 2.0    |
| Choline                                              | 0.1                     | 0.1    | 0.1    | 0.1    | 0.1    |
| SiO <sub>2</sub>                                     | 100.0                   | 70.0   | 50.0   | 30.0   | 0.0    |
| Trehalose                                            | 0.0                     | 30.0   | 50.0   | 70.0   | 100.0  |
| Total                                                | 1000.0                  | 1000.0 | 1000.0 | 1000.0 | 1000.0 |
|                                                      | Calculate value         |        |        |        |        |
| Metabolizable energy<br>(Kcal/Kg)                    | 3154                    | 3154   | 3154   | 3154   | 3154   |
| Crude protein (g/Kg)                                 | 220.0                   | 220.0  | 220.0  | 220.0  | 220.0  |
| Calcium (g/Kg)                                       | 11.8                    | 11.8   | 11.8   | 11.8   | 11.8   |
| Available<br>phosphorus (g/Kg)                       | 4.6                     | 4.6    | 4.6    | 4.6    | 4.6    |

**Supplementary Table S3.** The components of experimental diets in the finisher period of broilers.

| Ingredient                                           | Levels of trehalose (%) |        |        |        |        |
|------------------------------------------------------|-------------------------|--------|--------|--------|--------|
|                                                      | 0                       | 3      | 5      | 7      | 10     |
|                                                      | g/Kg                    |        |        |        |        |
| Yellow corn                                          | 393.2                   | 393.2  | 393.2  | 393.2  | 393.2  |
| Soybean meal                                         | 412.4                   | 412.4  | 412.4  | 412.4  | 412.4  |
| Fish meal                                            | 0.0                     | 0.0    | 0.0    | 0.0    | 0.0    |
| Soybean oil                                          | 109.0                   | 109.0  | 109.0  | 109.0  | 109.0  |
| DL-methionine                                        | 2.3                     | 2.3    | 2.3    | 2.3    | 2.3    |
| Ca(H <sub>2</sub> PO <sub>4</sub> )-H <sub>2</sub> O | 15.0                    | 15.0   | 15.0   | 15.0   | 15.0   |
| CaCO <sub>3</sub>                                    | 10.0                    | 10.0   | 10.0   | 10.0   | 10.0   |
| NaCl                                                 | 3.0                     | 3.0    | 3.0    | 3.0    | 3.0    |
| Vitamin-premix                                       | 3.0                     | 3.0    | 3.0    | 3.0    | 3.0    |
| Mineral-premix                                       | 2.0                     | 2.0    | 2.0    | 2.0    | 2.0    |
| Choline                                              | 0.1                     | 0.1    | 0.1    | 0.1    | 0.1    |
| SiO <sub>2</sub>                                     | 100.0                   | 70.0   | 50.0   | 30.0   | 0.0    |
| Trehalose                                            | 0.0                     | 30.0   | 50.0   | 70.0   | 100.0  |
| Total                                                | 1000.0                  | 1000.0 | 1000.0 | 1000.0 | 1000.0 |
|                                                      | <i>Calculate value</i>  |        |        |        |        |
| Metabolizable energy (Kcal/Kg)                       | 3201                    | 3201   | 3201   | 3201   | 3201   |
| Crude protein (g/Kg)                                 | 210.0                   | 210.0  | 210.0  | 210.0  | 210.0  |
| Calcium (%)                                          | 11.5                    | 11.5   | 11.5   | 11.5   | 11.5   |
| Available phosphorus (%)                             | 4.3                     | 4.3    | 4.3    | 4.3    | 4.3    |

**Supplementary Table S4.** The components of experimental diets in the starter period of broilers.

| Ingredient                                           | Levels of trehalose (%) |        |        |        |
|------------------------------------------------------|-------------------------|--------|--------|--------|
|                                                      | 0                       | 1      | 3      | 5      |
|                                                      | g/Kg                    |        |        |        |
| Yellow corn                                          | 384.7                   | 384.7  | 384.7  | 384.7  |
| Soybean meal                                         | 398.1                   | 398.1  | 398.1  | 398.1  |
| Fish meal                                            | 50.0                    | 50.0   | 50.0   | 50.0   |
| Soybean oil                                          | 82.0                    | 82.0   | 82.0   | 82.0   |
| DL-methionine                                        | 2.0                     | 2.0    | 2.0    | 2.0    |
| Ca(H <sub>2</sub> PO <sub>4</sub> )-H <sub>2</sub> O | 13.1                    | 13.1   | 13.1   | 13.1   |
| CaCO <sub>3</sub>                                    | 12.0                    | 12.0   | 12.0   | 12.0   |
| NaCl                                                 | 3.0                     | 3.0    | 3.0    | 3.0    |
| Vitamin-premix                                       | 3.0                     | 3.0    | 3.0    | 3.0    |
| Mineral-premix                                       | 2.0                     | 2.0    | 2.0    | 2.0    |
| Choline                                              | 0.1                     | 0.1    | 0.1    | 0.1    |
| SiO <sub>2</sub>                                     | 50.0                    | 40.0   | 20.0   | 0.0    |
| Trehalose                                            | 0.0                     | 10.0   | 30.0   | 50.0   |
| Total                                                | 1000.0                  | 1000.0 | 1000.0 | 1000.0 |
|                                                      | <i>Calculate value</i>  |        |        |        |
| Metabolizable energy (Kcal/Kg)                       | 3031                    | 3031   | 3031   | 3031   |
| Crude protein (g/Kg)                                 | 235.0                   | 235.0  | 235.0  | 235.0  |
| Calcium (g/Kg)                                       | 10.9                    | 10.9   | 10.9   | 10.9   |
| Available phosphorus (g/Kg)                          | 5.0                     | 5.0    | 5.0    | 5.0    |



**Supplementary Table S5.** The components of experimental diets in the grower period of broilers.

| Ingredient                                           | Levels of trehalose (%) |        |        |        |
|------------------------------------------------------|-------------------------|--------|--------|--------|
|                                                      | 0                       | 1      | 3      | 5      |
|                                                      | g/Kg                    |        |        |        |
| Yellow corn                                          | 365.7                   | 365.7  | 365.7  | 365.7  |
| Soybean meal                                         | 440.6                   | 440.6  | 440.6  | 440.6  |
| Fish meal                                            | 0.0                     | 0.0    | 0.0    | 0.0    |
| Soybean oil                                          | 107.0                   | 107.0  | 107.0  | 107.0  |
| DL-methionine                                        | 2.3                     | 2.3    | 2.3    | 2.3    |
| Ca(H <sub>2</sub> PO <sub>4</sub> )-H <sub>2</sub> O | 16.0                    | 16.0   | 16.0   | 16.0   |
| CaCO <sub>3</sub>                                    | 10.3                    | 10.3   | 10.3   | 10.3   |
| NaCl                                                 | 3.0                     | 3.0    | 3.0    | 3.0    |
| Vitamin-premix                                       | 3.0                     | 3.0    | 3.0    | 3.0    |
| Mineral-premix                                       | 2.0                     | 2.0    | 2.0    | 2.0    |
| Choline                                              | 0.1                     | 0.1    | 0.1    | 0.1    |
| SiO <sub>2</sub>                                     | 50.0                    | 40.0   | 20.0   | 0.0    |
| Trehalose                                            | 0.0                     | 10.0   | 30.0   | 50.0   |
| Total                                                | 1000.0                  | 1000.0 | 1000.0 | 1000.0 |
|                                                      | <i>Calculate value</i>  |        |        |        |
| Metabolizable energy                                 | 3154                    | 3154   | 3154   | 3154   |
| (Kcal/Kg)                                            |                         |        |        |        |
| Crude protein (g/Kg)                                 | 220.0                   | 220.0  | 220.0  | 220.0  |
| Calcium (g/Kg)                                       | 11.8                    | 11.8   | 11.8   | 11.8   |
| Available phosphorus                                 | 4.6                     | 4.6    | 4.6    | 4.6    |
| (g/Kg)                                               |                         |        |        |        |

**Supplementary Table S6.** The components of experimental diets in the finisher period of broilers.

| Ingredient                                           | Levels of trehalose (%) |        |        |        |
|------------------------------------------------------|-------------------------|--------|--------|--------|
|                                                      | 0                       | 1      | 3      | 5      |
|                                                      | g/Kg                    |        |        |        |
| Yellow corn                                          | 393.2                   | 393.2  | 393.2  | 393.2  |
| Soybean meal                                         | 412.4                   | 412.4  | 412.4  | 412.4  |
| Fish meal                                            | 0.0                     | 0.0    | 0.0    | 0.0    |
| Soybean oil                                          | 109.0                   | 109.0  | 109.0  | 109.0  |
| DL-methionine                                        | 2.3                     | 2.3    | 2.3    | 2.3    |
| Ca(H <sub>2</sub> PO <sub>4</sub> )-H <sub>2</sub> O | 15.0                    | 15.0   | 15.0   | 15.0   |
| CaCO <sub>3</sub>                                    | 10.0                    | 10.0   | 10.0   | 10.0   |
| NaCl                                                 | 3.0                     | 3.0    | 3.0    | 3.0    |
| Vitamin-premix                                       | 3.0                     | 3.0    | 3.0    | 3.0    |
| Mineral-premix                                       | 2.0                     | 2.0    | 2.0    | 2.0    |
| Choline                                              | 0.1                     | 0.1    | 0.1    | 0.1    |
| SiO <sub>2</sub>                                     | 50.0                    | 40.0   | 20.0   | 0.0    |
| Trehalose                                            | 0.0                     | 10.0   | 30.0   | 50.0   |
| Total                                                | 1000.0                  | 1000.0 | 1000.0 | 1000.0 |
|                                                      | <i>Calculate value</i>  |        |        |        |
| Metabolizable energy (Kcal/Kg)                       | 3201                    | 3201   | 3201   | 3201   |
| Crude protein (g/Kg)                                 | 210.0                   | 210.0  | 210.0  | 210.0  |
| Calcium (%)                                          | 11.5                    | 11.5   | 11.5   | 11.5   |
| Available phosphorus (%)                             | 4.3                     | 4.3    | 4.3    | 4.3    |

**Supplementary Table S7.** Effects of trehalose (Tre) on body weight (g) of broilers.

| Age(day) | Aviagen <sup>1</sup> | Treatment       |                 |                 |                 |                 |
|----------|----------------------|-----------------|-----------------|-----------------|-----------------|-----------------|
|          |                      | Control         | 3% Tre          | 5% Tre          | 7% Tre          | 10% Tre         |
| 0        | 42.00                | 44.81 ± 0.83    | 44.52 ± 0.70    | 44.53 ± 0.69    | 44.55 ± 0.73    | 44.84 ± 0.82    |
| 7        | 179.60               | 197.27 ± 1.96   | 188.27 ± 5.22   | 197.13 ± 3.16   | 182.46 ± 5.96   | 183.67 ± 5.13   |
| 14       | 450.00               | 543.07 ± 13.35  | 527.44 ± 14.21  | 548.70 ± 12.88  | 526.61 ± 16.06  | 535.64 ± 15.58  |
| 21       | 868.00               | 1066.43 ± 30.07 | 1035.15 ± 29.99 | 1067.04 ± 26.34 | 1052.59 ± 31.73 | 1056.83 ± 27.47 |
| 28       | 1406.00              | 1736.05 ± 54.28 | 1739.35 ± 49.14 | 1773.56 ± 50.48 | 1727.89 ± 52.90 | 1760.31 ± 47.04 |
| 35       | 2013.00              | 2462.38 ± 72.28 | 2502.37 ± 68.76 | 2608.17 ± 71.05 | 2493.47 ± 69.97 | 2497.07 ± 59.36 |

The data are given as mean±SEM (n = 14~15). Mean values with different letters within each feeding week are significantly different (p < 0.05). No significant differences (p > 0.05) were observed in body weight among the groups with 3%, 5%, 7% and 10% trehalose supplementation when compared to the control group throughout the test period. <sup>1</sup> Data are offered by the broiler feeding manual of Aviagen, a commercial broiler breeding company.

**Supplementary Table S8.** Effects of trehalose (Tre) on daily weight gain and feed intake, feed conversion ratio and mortality of broilers based on each feeding period.

| Feeding period (day) | Parameter                            | Treatment            |              |              |               |              |              |
|----------------------|--------------------------------------|----------------------|--------------|--------------|---------------|--------------|--------------|
|                      |                                      | Aviagen <sup>1</sup> | Control      | 3% Tre       | 5% Tre        | 7% Tre       | 10% Tre      |
| 0-7                  | Daily gain (g/broiler/cage)          | 19.57                | 21.78 ± 0.39 | 20.54 ± 0.76 | 21.79 ± 0.39  | 19.69 ± 0.90 | 19.83 ± 0.66 |
|                      | Daily feed intake (g/broiler/cage)   | 23.29                | 21.61 ± 0.26 | 19.41 ± 1.22 | 21.39 ± 0.34  | 20.29 ± 1.21 | 20.51 ± 0.64 |
|                      | Feed conversion ratio (g feed/g wt.) | 1.19                 | 0.99 ± 0.01  | 0.94 ± 0.04  | 0.98 ± 0.01   | 1.04 ± 0.01  | 1.03 ± 0.01  |
| 0-14                 | Daily gain (g/broiler/cage)          | 29.14                | 35.59 ± 0.95 | 34.49 ± 1.03 | 36.01 ± 0.90  | 34.43 ± 1.17 | 35.05 ± 1.06 |
|                      | Daily feed intake (g/broiler/cage)   | 37.71                | 39.50 ± 2.17 | 37.38 ± 1.19 | 39.94 ± 0.61  | 38.42 ± 1.28 | 39.27 ± 1.02 |
|                      | Feed conversion ratio (g feed/g wt.) | 1.29                 | 1.11 ± 0.03  | 1.08 ± 0.01  | 1.11 ± 0.01   | 1.12 ± 0.01  | 1.12 ± 0.00  |
| 0-21                 | Daily gain (g/broiler/cage)          | 39.33                | 48.60 ± 1.43 | 47.17 ± 1.44 | 48.69 ± 1.24  | 48.00 ± 1.52 | 48.19 ± 1.28 |
|                      | Daily feed intake (g/broiler/cage)   | 55.19                | 59.51 ± 1.59 | 56.78 ± 1.52 | 59.76 ± 1.54  | 58.42 ± 1.94 | 58.79 ± 1.54 |
|                      | Feed conversion ratio (g feed/g wt.) | 1.40                 | 1.22 ± 0.01  | 1.20 ± 0.01  | 1.23 ± 0.02   | 1.22 ± 0.01  | 1.23 ± 0.01  |
| 0-28                 | Daily gain (g/broiler/cage)          | 48.71                | 60.40 ± 1.93 | 60.53 ± 1.77 | 61.75 ± 1.79  | 60.12 ± 1.90 | 61.26 ± 1.66 |
|                      | Daily feed intake (g/broiler/cage)   | 74.29                | 78.48 ± 2.62 | 78.00 ± 1.71 | 80.91 ± 3.67  | 78.67 ± 1.41 | 79.50 ± 2.23 |
|                      | Feed conversion ratio (g feed/g wt.) | 1.53                 | 1.30 ± 0.02  | 1.29 ± 0.02  | 1.31 ± 0.04   | 1.31 ± 0.03  | 1.31 ± 0.02  |
| 0-35                 | Daily gain (g/broiler/cage)          | 56.3                 | 69.07 ± 2.03 | 70.22 ± 1.97 | 73.24 ± 2.03  | 69.97 ± 2.01 | 70.06 ± 1.68 |
|                      | Daily feed intake (g/broiler/cage)   | 93.31                | 97.42 ± 2.73 | 97.49 ± 1.55 | 104.27 ± 2.20 | 97.51 ± 1.41 | 97.42 ± 2.73 |
|                      | Feed conversion ratio (g feed/g wt.) | 1.66                 | 1.41 ± 0.05  | 1.39 ± 0.02  | 1.42 ± 0.03   | 1.40 ± 0.02  | 1.40 ± 0.06  |
| 0-35                 | Mortality (number of broilers)       | -                    | 0            | 0            | 0             | 1            | 1            |

The data are given as mean±SEM (n = 3). Mean values with different letters in each testing parameter with the same feeding period are significantly different (p < 0.05). No significant differences (p > 0.05) were observed in daily weight gain, feed intake or feed conversion ratio among the groups with 3%, 5%, 7% and 10% trehalose supplementation when compared to the control group throughout the test period. <sup>1</sup> Data are offered by the broiler feeding manual of Aviagen, a commercial broiler breeding company.

**Supplementary Table S9.** Effects of trehalose (Tre) on body weight (g) of broilers orally challenged with *C. jejuni* (C.J.).

| Age (days) | Aviagen <sup>1</sup> | Treatment       |                 |                 |                 |                 |
|------------|----------------------|-----------------|-----------------|-----------------|-----------------|-----------------|
|            |                      | Control         | 0% Tre+C.J.     | 1% Tre+C.J.     | 3% Tre+C.J.     | 5% Tre+C.J.     |
| 0          | 42.00                | 45.32± 0.66     | 44.64 ± 0.77    | 45.31 ± 0.78    | 44.96 ± 0.62    | 45.15 ± 0.71    |
| 7          | 179.60               | 193.92 ± 3.46   | 191.24 ± 3.77   | 187.89 ± 3.13   | 191.26 ± 3.48   | 184.90 ± 3.54   |
| 14         | 450.00               | 517.24 ± 9.51   | 515.07 ± 12.90  | 514.86 ± 10.00  | 507.37 ± 11.97  | 502.15 ± 7.81   |
| 21         | 868.00               | 1001.89 ± 20.87 | 1001.12 ± 22.05 | 1020.21 ± 21.47 | 1002.25 ± 26.82 | 966.53 ± 15.24  |
| 28         | 1406.00              | 1492.94 ± 34.75 | 1527.11 ± 35.82 | 1545.68 ± 25.66 | 1579.23 ± 39.76 | 1532.00 ± 27.27 |
| 35         | 2013.00              | 2108.29 ± 48.77 | 2063.19 ± 49.67 | 2146.26 ± 51.31 | 2186.96 ± 47.30 | 2066.52 ± 33.47 |

The data are given as mean±SEM (n = 14~15). Mean values with different letters in each feeding week were significantly different (p < 0.05). Body weight of broilers showed no significant differences (p > 0.05) between *C. jejuni* and trehalose supplementation in both pre-inoculation and post-inoculation periods. <sup>1</sup> Data are offered by the broiler feeding manual of Aviagen, a commercial broiler breeding company.

**Supplementary Table S10.** Effects of trehalose (Tre) on daily weight gain and feed intake, feed conversion ratio and mortality of broilers orally challenged with *C. jejuni* (C.J.) according to pre-inoculation and post-inoculation periods.

| Feeding period (day)                          | Parameter                            | Aviagen <sup>1</sup> | Treatment     |               |                |                |               |
|-----------------------------------------------|--------------------------------------|----------------------|---------------|---------------|----------------|----------------|---------------|
|                                               |                                      |                      | Control       | 0%Tre+C.J.    | 1%Tre+C.J.     | 3%Tre+C.J.     | 5%Tre+C.J.    |
| Pre-inoculation period                        |                                      |                      |               |               |                |                |               |
| 0-28                                          | Daily gain (g/broiler/cage)          | 48.71                | 49.91 ± 0.68  | 52.31 ± 0.82  | 54.31 ± 0.36   | 53.11 ± 2.84   | 51.41 ± 1.38  |
|                                               | Daily feed intake (g/broiler/cage)   | 74.29                | 70.71 ± 1.23  | 73.68 ± 1.94  | 76.35 ± 0.50   | 75.18 ± 4.40   | 72.54 ± 1.71  |
|                                               | Feed conversion ratio (g feed/g wt.) | 1.53                 | 1.42 ± 0.01   | 1.41 ± 0.02   | 1.41 ± 0.01    | 1.41 ± 0.01    | 1.41 ± 0.00   |
| Post-inoculation period                       |                                      |                      |               |               |                |                |               |
| 28-35                                         | Daily gain (g/broiler/cage)          | 86.71                | 83.39 ± 3.75  | 78.18 ± 4.54  | 85.54 ± 5.25   | 83.73 ± 3.14   | 81.27 ± 1.74  |
|                                               | Daily feed intake (g/broiler/cage)   | 169.43               | 143.17 ± 7.65 | 135.40 ± 8.89 | 148.41 ± 11.67 | 145.94 ± 13.16 | 141.92 ± 4.33 |
|                                               | Feed conversion ratio (g feed/g wt.) | 1.95                 | 1.72 ± 0.02   | 1.73 ± 0.07   | 1.73 ± 0.07    | 1.74 ± 0.12    | 1.75 ± 0.06   |
| Overall (0-35) Mortality (number of broilers) |                                      | -                    | 1             | 0             | 0              | 0              | 0             |

The data are given as mean±SEM (n = 3). Mean values with different letters in each feeding week were significantly different (p < 0.05). The average daily weight gain, feed intake and feed conversion ratio showed no significant differences (p > 0.05) between *C. jejuni* and trehalose supplementation in both pre-inoculation and post-inoculation periods. <sup>1</sup>Data are offered by the broiler feeding manual of Aviagen, a commercial broiler breeding company.

**Supplementary Table S11.** Effects of trehalose (Tre) on total *Lactobacillus* counts in portions of intestine or feces of broilers orally challenged with *C. jejuni* (C.J.)

| Intestinal Segment /Feces                                                 | Treatment      |               |                |               |                |
|---------------------------------------------------------------------------|----------------|---------------|----------------|---------------|----------------|
|                                                                           | Control        | 0%Tre+C.J.    | 1%Tre+C.J.     | 3%Tre+C.J.    | 5%Tre+C.J.     |
| Total <i>Lactobacillus</i> counts (log cfu/g intestinal content or feces) |                |               |                |               |                |
| Duodenum                                                                  | 10.46 ± 0.34ab | 9.72 ± 0.39b  | 10.64 ± 0.33ab | 11.63 ± 0.39a | 10.66 ± 0.34ab |
| Jejunum                                                                   | 11.71 ± 0.19a  | 11.49 ± 0.26a | 11.80 ± 0.22a  | 11.40 ± 0.41a | 11.65 ± 0.23a  |
| Ileum                                                                     | 11.35 ± 0.24c  | 11.31 ± 0.20c | 11.80 ± 0.22bc | 12.15 ± 0.16a | 12.09 ± 0.25ab |
| Caecum                                                                    | 10.75 ± 0.29b  | 10.78 ± 0.37b | 11.51 ± 0.32ab | 11.95 ± 0.23a | 11.18 ± 0.26ab |
| Feces                                                                     | 12.74 ± 0.19a  | 12.90 ± 0.10a | 12.63 ± 0.30a  | 12.34 ± 0.26a | 13.06 ± 0.19a  |

The data are given as mean±SEM (n = 14~15, except feces n = 3 with at least triplicate per cage). Mean values within each tested portion of intestine or feces with different letters are significantly different (p < 0.05)

**Supplementary Table S12.** Effects of trehalose (Tre) on body weight (g) of broilers orally challenged with *C. perfringens* (C.P.).

| Age(day) | Aviagen <sup>1</sup> | Treatment       |                 |                 |                 |                  |
|----------|----------------------|-----------------|-----------------|-----------------|-----------------|------------------|
|          |                      | Control         | 0% Tre+C.P.     | 1% Tre+C.P.     | 3% Tre+C.P.     | 5% Tre+C.P.      |
| 0        | 42.00                | 45.32± 0.66     | 42.71 ± 0.64    | 43.39 ± 0.64    | 43.33 ± 0.57    | 43.28 ± 0.61     |
| 7        | 179.60               | 193.92 ± 3.46   | 196.13 ± 4.09   | 200.36 ± 4.14   | 194.76 ± 3.10   | 198.91 ± 4.18    |
| 14       | 450.00               | 517.24 ± 9.51   | 463.56 ± 8.30   | 462.15 ± 9.30   | 462.13 ± 8.68   | 466.54 ± 10.45   |
| 21       | 868.00               | 1001.89 ± 20.87 | 912.35 ± 16.56  | 904.22 ± 21.21  | 900.91 ± 15.89  | 877.91 ± 22.22   |
| 28       | 1406.00              | 1492.94 ± 34.75 | 1418.66 ± 30.99 | 1434.39 ± 27.36 | 1454.35 ± 31.50 | 1418.43 ± 42.04  |
| 32       | 1748.00              | 1790.38 ± 19.47 | 1794.44 ± 54.38 | 1795.36 ± 40.75 | 1819.35 ± 54.99 | 1845.40 ± 56.64  |
| 39       | 2370.00              | 2492.59 ± 61.55 | 2424.71 ± 60.18 | 2523.09 ± 53.09 | 2464.07 ± 60.79 | 2497.58 ± 108.58 |

The data are given as mean±SEM (n = 13~15). Mean values with different letters in each feeding week were significantly different (p<0.05). Body weight of broilers showed no significant differences (p > 0.05) between *C. perfringens* and trehalose supplementation in both pre-inoculation and post-inoculation periods. <sup>1</sup> Data are offered by the broiler feeding manual of Aviagen, a commercial broiler breeding company.



**Supplementary Table S13.** Effects of trehalose (Tre) on daily weight gain and feed intake, feed conversion ratio and mortality of broilers orally challenged with *C. perfringens* (C.P.) according to pre-inoculation and post-inoculation periods.

| Feeding period (day)                          | Parameter                            | Aviagen <sup>1</sup> | Control       | Treatment     |               |               |               |
|-----------------------------------------------|--------------------------------------|----------------------|---------------|---------------|---------------|---------------|---------------|
|                                               |                                      |                      |               | 0%Tre+C.P.    | 1%Tre+C.P.    | 3%Tre+C.P.    | 5%Tre+C.P.    |
| Pre-inoculation period                        |                                      |                      |               |               |               |               |               |
| 0-32                                          | Daily gain (g/broiler/cage)          | 53.31                | 54.69 ± 0.52  | 54.81 ± 0.56  | 54.72 ± 0.37  | 55.66 ± 1.55  | 56.51 ± 0.80  |
|                                               | Daily feed intake (g/broiler/cage)   | 85.28                | 79.75 ± 1.07  | 81.02 ± 1.18  | 79.68 ± 0.85  | 81.25 ± 2.39  | 81.79 ± 1.12  |
|                                               | Feed conversion ratio (g feed/g wt.) | 1.60                 | 1.46 ± 0.01   | 1.48 ± 0.01   | 1.46 ± 0.01   | 1.46 ± 0.01   | 1.45 ± 0.00   |
| Post-inoculation period                       |                                      |                      |               |               |               |               |               |
| 33-39                                         | Daily gain (g/broiler/cage)          | 88.90                | 88.58 ± 5.70  | 93.42 ± 0.46  | 103.97 ± 1.64 | 96.14 ± 6.22  | 94.30 ± 4.50  |
|                                               | Daily feed intake (g/broiler/cage)   | 187.14               | 161.89 ± 8.13 | 168.38 ± 0.64 | 186.57 ± 6.36 | 171.20 ± 8.94 | 172.26 ± 4.21 |
|                                               | Feed conversion ratio (g feed/g wt.) | 2.11                 | 1.83 ± 0.06   | 1.80 ± 0.01   | 1.79 ± 0.04   | 1.79 ± 0.04   | 1.83 ± 0.05   |
| Overall (0-39) Mortality (number of broilers) |                                      | -                    | 0             | 1             | 1             | 1             | 2             |

The data are given as mean±SEM (n = 3). Mean values with different letters in each feeding week were significantly different (p < 0.05). The average daily weight gain, feed intake and feed conversion ratio showed no significant differences (p > 0.05) between *C. perfringens* and trehalose supplementation in both pre-inoculation and post-inoculation periods. <sup>1</sup> Data are offered by the broiler feeding manual of Aviagen, a commercial broiler breeding company

**Supplementary Table S14.** Effects of trehalose (Tre) on total *Lactobacillus* counts in portions of intestine or feces of broilers orally challenged with *C. perfringens* (C.P.).

| Intestinal<br>Segment<br>/Feces                                           | Treatment     |               |               |               |               |
|---------------------------------------------------------------------------|---------------|---------------|---------------|---------------|---------------|
|                                                                           | Control       | 0%Tre+C.P.    | 1%Tre+C.P.    | 3%Tre+C.P.    | 5%Tre+C.P.    |
| Total <i>Lactobacillus</i> counts (log cfu/g intestinal content or feces) |               |               |               |               |               |
| Duodenum                                                                  | 10.85 ± 0.38a | 9.49 ± 0.29b  | 10.62 ± 0.18a | 10.47 ± 0.27a | 10.88 ± 0.41a |
| Jejunum                                                                   | 11.32 ± 0.16a | 11.20 ± 0.16a | 11.02 ± 0.13a | 11.17 ± 0.20a | 11.03 ± 0.18a |
| Ileum                                                                     | 11.70 ± 0.16a | 10.96 ± 0.10b | 11.00 ± 0.14b | 11.62 ± 0.14a | 11.68 ± 0.13a |
| Caecum                                                                    | 10.49 ± 0.19a | 10.48 ± 0.28a | 10.23 ± 0.29a | 9.87 ± 0.26a  | 10.14 ± 0.31a |
| Feces                                                                     | 12.22 ± 0.18a | 12.76 ± 0.06a | 12.46 ± 0.15a | 12.59 ± 0.16a | 12.74 ± 0.16a |

The data are given as mean±SEM (n = 13~15, except feces n = 3 with at least triplicate per cage). Mean values within each tested portion of intestine or feces with different letters are significantly different (p < 0.05).
